# Supplementary material
Source: publisher figshare collection journal article supplement (https://acs.figshare.com/ndownloader/files/3835426)
Supplement: Supplementary file 1 [file 3835426]

# **The Effect of Blue Light on the Electronic and Structural Properties of Bilirubin Isomers: Insights into the Photoisomerization and Photooxidation Processes**

Lucas C. Cardoso, Ranylson M. L. Savedra, Mariana M. da Silva, Giovana R. Ferreira , Rodrigo F. Bianchi, and Melissa F. Siqueira\*

*Laboratório de Polímeros e Propriedades Eletrônicas de Materiais, Departamento de Física,  
Universidade Federal de Ouro Preto, Campus Morro do Cruzeiro, 35400-000 Ouro  
Preto-MG, Brazil*

E-mail: melissa@iceb.ufop.br

---

\*To whom correspondence should be addressed

## Support Information

The  $I/I_0$  vs exposure time curves, shown in the insets of Figures 2 and 3, were fitted using the following Boltzmann sigmoidal function:

$$\frac{I}{I_0} = m_2 + \frac{m_1 - m_2}{1 + e^{[(t-t_0)/dt]}} \quad (1)$$

In Equation 1, the parameter  $m_1$  is the initial value of  $I/I_0$ ,  $m_2$  is its final value,  $t$  is the center of the function, and  $dt$  is a time constant. Table S1 shows the parameters obtained from these fits for all bilirubin solution studied.

**Table S1: Boltzmann sigmoidal parameters obtained from the fitting of maximal wavelengths for all bilirubin solutions studied.**

| Solution             | $m_1$ | $m_2$ | $t_0$ | $dt$  |
|----------------------|-------|-------|-------|-------|
| CHCl <sub>3</sub>    | 1.00  | -0.02 | 62.84 | 23.38 |
| milli-Q              | 1.00  | 0.10  | 23.64 | 10.63 |
| physiological saline | 0.99  | 0.04  | 37.10 | 11.37 |

Figure S1 shows UV–visible absorption spectra measured for a sample of bilirubin in chloroform without radiation exposure during 6 hours, recorded at 1h intervals.

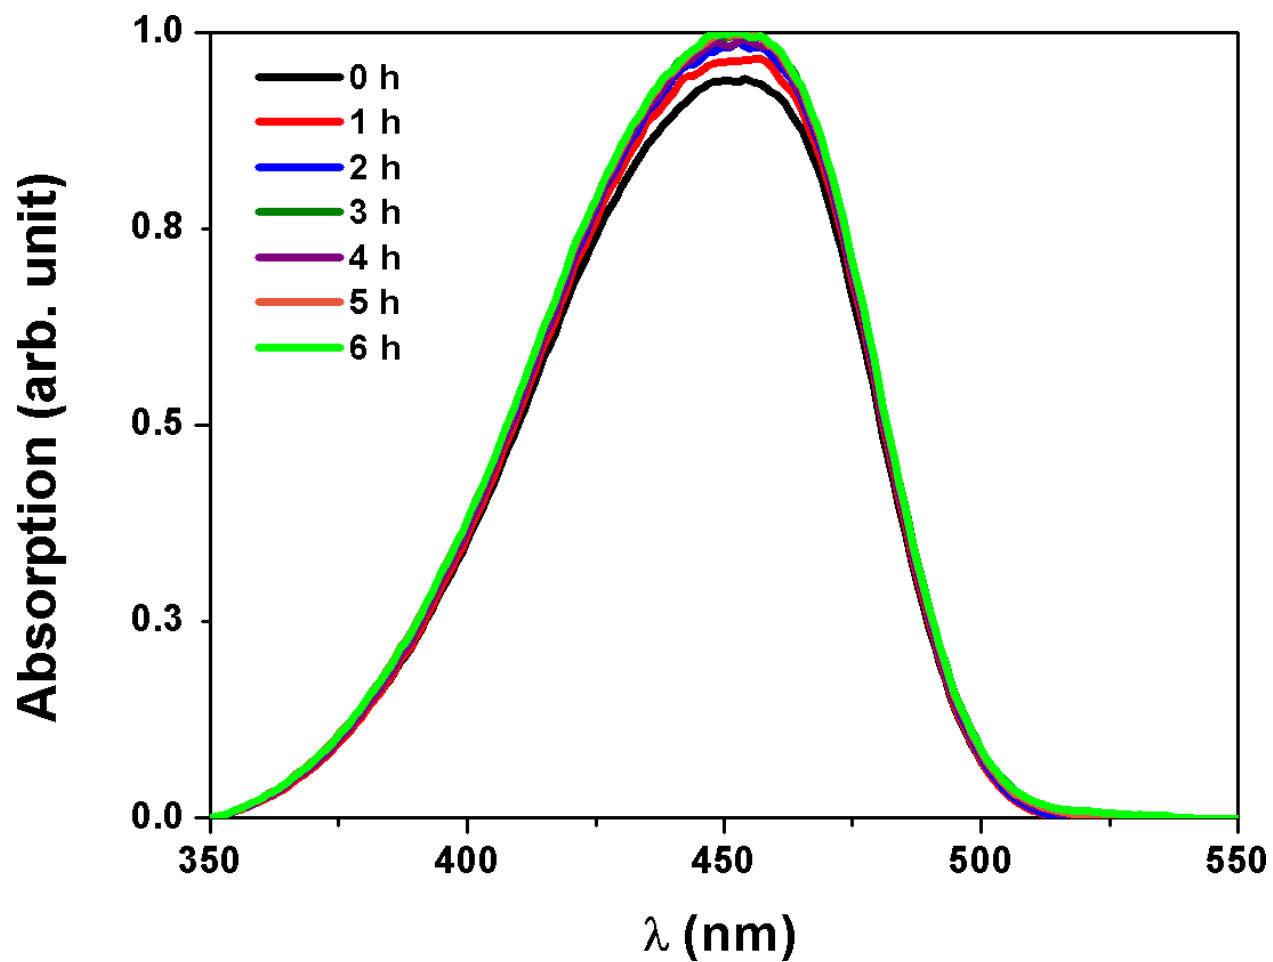

Figure S1: Normalized UV–visible spectra measured for bilirubin sample in chloroform without radiation exposure during 6 hours at 1h intervals.
